1 **Title:**

2 Origination of the circadian clock system in stem cells regulates cell differentiation

3

4 **Authors:**

5 Kotaro Torii<sup>1,2†</sup>, Keisuke Inoue<sup>1†</sup>, Keita Bekki<sup>1,2</sup>, Kazuya Haraguchi<sup>4</sup>, Minoru Kubo<sup>3</sup>, Yuki  
6 Kondo<sup>5</sup>, Takamasa Suzuki<sup>6</sup>, Hanako Shimizu<sup>1</sup>, Kyohei Uemoto<sup>1,2</sup>, Masato Saito<sup>5</sup>, Hiroo  
7 Fukuda<sup>5</sup>, Takashi Araki<sup>1</sup>, Motomu Endo<sup>2\*</sup>.

8

9 **Affiliations:**

- 10 1. Division of Integrated Life Science, Graduate School of Biostudies, Kyoto University,  
11 Sakyo, Kyoto 606-8501, Japan.
- 12 2. Graduate School of Science and Technology, Nara Institute of Science and Technology,  
13 Ikoma, Nara 630-0192, Japan.
- 14 3. Institute for Research Initiatives, Nara Institute of Science and Technology, Ikoma, Nara  
15 630-0192, Japan.
- 16 4. Department of Information and Management Science, Faculty of Commerce, Otaru  
17 University of Commerce, Midori 3-5-21, Otaru, Hokkaido 047-8501, Japan
- 18 5. Department of Biological Sciences, Graduate School of Science, The University of Tokyo,  
19 7-3-1 Hongo, Bunkyo-ku, Tokyo 113-0033, Japan
- 20 6. Department of Biological Chemistry, College of Bioscience and Biotechnology, Chubu  
21 University, Kasugai, Aichi 487-8501, Japan.

22

23 † These authors contributed equally to this work.

24

25 Correspondence to:

26 Motomu Endo

27 E-mail: endo@bs.naist.jp

28 Tel: +81-743-72-5450

29

30 **The circadian clock regulates various physiological responses. To achieve this, both**  
31 **animals and plants have distinct circadian clocks in each tissue that are optimized for**  
32 **that tissue's respective functions. However, if and how the tissue-specific circadian**  
33 **clocks are involved in specification of cell types remains unclear. Here, by implementing**  
34 **a single-cell transcriptome with a new analytics pipeline, we have reconstructed an**  
35 **actual time-series of the cell differentiation process at single-cell resolution, and**  
36 **discovered that the *Arabidopsis* circadian clock is involved in the process of cell**  
37 **differentiation through transcription factor BRI1-EMS SUPPRESSOR 1 (BES1)**  
38 **signaling. In this pathway, direct repression of *LATE ELONGATED HYPOCOTYL***  
39 **(*LHY*) expression by BES1 triggers reconstruction of the circadian clock in stem cells.**  
40 **The reconstructed circadian clock regulates cell differentiation through fine-tuning of**  
41 **key factors for epigenetic modification, cell-fate determination, and the cell cycle. Thus,**  
42 **the establishment of circadian systems precedes cell differentiation and specifies cell**  
43 **types.**

44  
45 The circadian clock is involved in various physiological responses to regulate a large set of  
46 genes in both animals and plants<sup>1</sup>. Circadian clocks in each tissue regulate different responses  
47 consistent with tissue-specific sets of circadian-regulated genes<sup>2,3</sup>. The tissue-specific clocks  
48 are considered to be optimized for each tissue's respective functions, and therefore there is a  
49 possibility that the different clock functions in each tissue contribute to specify the cell type.

50 In mammalian embryonic stem cells, circadian rhythms are not observed during early  
51 developmental stages, but they emerge along with cell differentiation; and the circadian  
52 rhythms in differentiated cells disappear when they are reprogrammed<sup>4</sup>. Consistently, several  
53 mutations in clock genes cause abnormal cell differentiation in mammals<sup>5</sup>. In *Arabidopsis*, a  
54 *circadian clock associated 1; late elongated hypocotyl* double mutant (*cca1 lhy*) shows an

55 increased number of free-ending vascular bundles<sup>6</sup>, indicating abnormal vascular cell  
56 differentiation in the clock mutant.

57 To investigate the involvement of the plant circadian clock in cell differentiation, we  
58 performed detailed observations of clock mutants, *cca1*; *lhy*; *timing of CAB expression 1*  
59 (*cca1 lhy toc1*) as well as a knockdown of *BROTHER OF LUX ARRHYTHMO* (also known as  
60 *NOX*) by artificial microRNA in a *lux arrhythmo/phytoclock1* mutant background (*lux nox*).  
61 We confirmed that the clock mutants affect development of vascular bundles, guard cells, and  
62 root cells (Supplementary Fig. 1a–c), suggesting that the plant circadian clock is generally  
63 involved in the process of cell differentiation. We then utilized the vascular cell differentiation  
64 induction system, referred to as VISUAL<sup>7</sup>, for further investigation of the molecular  
65 mechanisms driving the clock-mediated cell differentiation. In this system, vascular cells  
66 (including both xylem and phloem cells) are induced from mesophyll cells through the stem  
67 cells and vascular stem cells (Fig. 1a). A loss-of-function mutation in *BRI1-EMS*  
68 *SUPPRESSOR 1 (BES1)* showed severe defects in vascular cell differentiation, as shown  
69 previously<sup>8</sup>. We found that clock mutants showed significant defects in vascular cell  
70 differentiation (Fig. 1b). Perturbation of endogenous circadian rhythms by random light/dark  
71 conditions also inhibited vascular cell differentiation (Fig. 1c), suggesting the requirement of  
72 a functional circadian clock for cell differentiation.

73 The VISUAL assay consists of two steps, dedifferentiation of mesophyll cells to stem  
74 cells and differentiation of stem cells into vascular cells via vascular stem cells. To determine  
75 which step is regulated by the circadian clock, we measured expression levels of cell-type-  
76 specific markers. In the wild type (WT), a mesophyll cell marker (*CAB3*) rapidly disappeared  
77 within 24 h after induction. Afterward, a vascular stem cell marker (*TDR*) and a vascular cell  
78 marker (*IRX3*) appeared in succession (Fig. 1d and Supplementary Fig. 1d–f). *TDR* was not  
79 fully induced in *cca1 lhy toc1* and *bes1* mutants, although the reduction of *CAB3* expression

80 in both mutants was comparable to WT (Fig. 1d). These data suggest that both the clock genes  
81 and BES1 are involved in the step of differentiation rather than dedifferentiation.

82 To clarify the relationship between the clock genes and BES1, we investigated a possible  
83 link between both factors. Consistent with a previous report<sup>9</sup>, chromatin immunoprecipitation  
84 (ChIP) using plants expressing BES1-GFP demonstrated enrichment of BES1-GFP at the G-  
85 box and E-box motifs in the *LHY* promoter (Fig. 2a). Transient co-expression of BES1 and  
86 *LHY::LUC* resulted in decreased luciferase activity (Fig. 2b), suggesting that BES1 acts as a  
87 repressor of *LHY* expression. In our VISUAL conditions, an active dephosphorylated BES1  
88 accumulated immediately after induction (Fig. 2c). Consistent with the accumulation of  
89 dephosphorylated BES1, the amplitude of *LHY* and *CCA1* expression decreased after  
90 induction (Fig. 2d). We next tested the effect of BES1 on *LHY* expression during VISUAL.  
91 Rhythmic *LHY* expression with low amplitude was sustained in WT, whereas the *bes1*  
92 mutation caused complete loss of *LHY* expression after induction (Fig. 2e). Given that stem  
93 cells should be enriched in *bes1* mutant after induction (Fig. 1d), the requirement of BES1 for  
94 *LHY* expression suggested that BES1 is essential for triggering circadian rhythms in the stem  
95 cells.

96 Since the expression of *TDR* and *IRX3* overlapped each other, and cell differentiation  
97 proceeded gradually, even in the VISUAL assay (Fig. 1d and Supplementary Fig. 1d–f), it was  
98 still unclear whether the development of circadian rhythms triggers cell differentiation or *vice*  
99 *versa*. To circumvent such low spatiotemporal resolution of bulk analysis, which can be  
100 attributed to the crude averaging of various cell types, we performed time-series single-cell  
101 RNA sequencing (scRNA-seq) with VISUAL. Although making protoplasts is the  
102 conventional way to obtain single plant cells, the procedure is not only time-consuming but  
103 also potentially stress-inducing. We therefore obtained total RNA from single cells using glass  
104 capillaries<sup>10</sup> (Supplementary Fig. 2a and Supplementary Video 1). 216 single cell samples

105 harvested every 4 h, from 24 h before induction up to 84 h after induction were subjected to  
106 RNA-seq, and the collected data were normalized together with time-series cell-population  
107 RNA sequencing (cpRNA-seq) data obtained from whole cotyledons (Supplementary Fig. 2b–  
108 e and Supplementary Table 1).

109 To separate xylem and phloem cell lineages, we first applied the Wishbone algorithm,  
110 which can order scRNA-seq data with bifurcating developmental trajectories<sup>11</sup>. t-distributed  
111 Stochastic Neighbor Embedding (t-SNE) of the dataset was represented by a Y-shaped  
112 structure, suggesting that the Wishbone can properly reconstruct developmental trajectories of  
113 xylem and phloem cells (Fig. 3a). This assertion was further validated by overlaying  
114 expression levels of cell-type-specific markers (Fig. 3b and Supplementary Fig. 3a). For  
115 simplicity, we focused on the xylem cell lineage and applied the Seurat algorithm<sup>12</sup> for  
116 improving temporal resolution of the pseudo-time trajectory. Seurat allowed us to estimate the  
117 most likely location of cells by referring to preset expression patterns of cell-type-specific  
118 markers. Clustering of the data obtained by applying 24 reference genes in Seurat yielded four  
119 major clusters presumed to be mesophyll cells, stem cells, vascular stem cells, and xylem  
120 cells (Supplementary Fig. 3b and Supplementary Table 2). The stem cell state was represented  
121 by high expression of *OBPI* and *ACS6* (Fig. 3b and Supplementary Fig. 3b). *OBPI* is highly  
122 expressed in tissue with high cell proliferation activity such as developing embryo and organ  
123 primordia<sup>13</sup>, and *ACS6* encodes the rate-limiting enzyme for biosynthesis of ethylene, a plant  
124 hormone that promotes stem cell division in the root<sup>14</sup>, demonstrating the utility of the two  
125 genes as stem cell markers.

126 In general, scRNA-seq analysis kills target cells in the process of obtaining  
127 transcriptome data; thus, time-series analysis is still a daunting problem<sup>15</sup>. Due to the lack of  
128 temporal information, circadian rhythms have not been rigorously studied using single-cell  
129 transcriptomes. To overcome this limitation and to reconstruct actual time-series from single-

130 cell transcriptome datasets, we developed the PeakMatch algorithm. The basic concept of  
131 PeakMatch is that the timing of significant gene expression peaks can be comparable between  
132 scRNA-seq data based on pseudo time-series and cpRNA-seq data based on actual time-series  
133 (Supplementary Fig. 3c, see Methods for details). By integrating estimated peak times of  
134 2,217 genes, we reconstructed an actual time-series and succeeded in improving segregation  
135 of each cell-type-specific marker (Fig. 3c,d), and detected 24 h rhythmicity of *LHY* and *CCA1*  
136 expression, even in scRNA-seq data (Fig. 3e and Supplementary Table 3). The half-value  
137 width of the gene expression peaks in the reconstructed actual time-series was narrow  
138 compared to that of cpRNA-seq (Fig. 3f), demonstrating that PeakMatch reduces the crude  
139 averaging effect and improves temporal resolution. Taken together, the Wishbone-Seurat-  
140 PeakMatch (WISP) pipeline improved spatiotemporal resolution of scRNA-seq data and  
141 enabled us to handle actual time-series data at single-cell resolution.

142 Using this reconstructed scRNA-seq data, we evaluated the expression of clock genes  
143 during cell differentiation. Consistent with our previous report<sup>3</sup>, expression of *PRR5* and  
144 *PRR7*, two clock genes whose expression is predominant in mesophyll cells, was diminished  
145 in concert with the loss of mesophyll cell identity, whereas *ELF4* and *LUX*, components of  
146 Evening Complex (EC) whose expression is enriched in vascular cells, began to emerge  
147 approximately 24 h after induction (Fig. 4a,b). We also found disruptions of circadian  
148 rhythms in the stem cells, as evidenced by the expression patterns of clock genes  
149 (Supplementary Fig. 3d). Since re-phasing of circadian rhythms was also observed in root  
150 stem cell niches<sup>16,17</sup>, reconstruction of the circadian clock system could be generally required  
151 for cell differentiation. To test how the reconstructed clock regulates cell differentiation, we  
152 calculated the kinetics of GO-term enrichment. GO-terms related to DNA methylation and  
153 cell cycle were significantly enriched soon after the induction of *ELF4* and *LUX* (Fig. 4c). We  
154 then performed ChIP-seq analysis using plants expressing LUX-GFP to identify direct targets

155 of the circadian clock (Supplementary Table 4). We found that *CYCD3;1*, *RBR*, and *E2Fc*,  
156 which play leading roles in the G<sub>1</sub>-S transition, were significantly enriched (Fig. 4d and  
157 Supplementary Fig. 4a). Consistently, clock mutants showed disruption of daily rhythms in  
158 cell proliferation and decreased numbers of meristematic cells, and altered cell-cycle-related  
159 gene expression and DNA ploidy patterns (Supplementary Fig. 4b–e). RBR also controls  
160 epigenetic regulation through DNA methylation during cell differentiation<sup>18</sup>, and E2Fc is  
161 reported as a key regulator for xylem differentiation<sup>19</sup>. Taken together, we concluded that the  
162 reconstructed circadian clock integratively regulates cell differentiation through fine-tuning of  
163 key factors for epigenetic modifications, cell-fate determination, and cell cycle (Fig. 4e). Our  
164 finding that BES1-triggered reconstruction of the circadian clock regulates genes related to  
165 cell cycle was further supported by re-analysis of recent scRNA-seq data<sup>20</sup> derived from root  
166 tips (Supplementary Fig. 4f).

167 We have demonstrated that establishment of circadian systems precedes cell  
168 differentiation, supporting the hypothesis that construction of the circadian clock for tissue-  
169 specific functions can specify cell types. Development of circadian rhythms during  
170 differentiation, and distinct functions of circadian clocks in each tissue, are common features  
171 across kingdoms<sup>2-4</sup>. Our findings and the WISP pipeline provide a new avenue for further  
172 studies of circadian clocks in cell differentiation.

173

174

## 175 **Figure legends**

### 176 **Figure 1. The plant circadian clock affects cell differentiation.**

177 **a**, Schematic of ectopic vascular cell induction with VISUAL. **b**, Lignin stained xylem cell  
178 density in WT, *bes1*, and clock mutants after induction. Light gray, green, and yellow bars  
179 indicate ectopically induced xylem cells. Dark gray bars indicate endogenous xylem cells (n =

180 5, mean  $\pm$ s.e.). Representative photos of lignin staining are below (bar = 1 mm). **c**,  
181 Perturbation of endogenous circadian rhythms by random light/dark periods  
182 (2L3D1L1D3L1D1L2D3L2D2L3D, total 12L12D per 24 h) inhibits vascular cell  
183 differentiation with VISUAL. Left, lignin stained xylem cell density and representative photos  
184 (n = 5, mean  $\pm$  s.e., bar = 1 mm, two-sided student's t-test,  $p < 0.05$ ). Right, expression  
185 patterns of *LHY::LUC* during VISUAL under normal and random light/dark conditions (n =  
186 10, mean  $\pm$  s.e.). **d**, Expression patterns of cell-type-specific markers during VISUAL in WT,  
187 *cca1 lhy toc1*, and *bes1* (n = 3, mean  $\pm$  s.e.). Green, red, and blue lines indicate marker genes  
188 for mesophyll cells (*CAB3*), vascular stem cells (*TDR*), and xylem cells (*IRX3*),  
189 respectively. Expression peaks of each respective gene in WT were normalized to 1. White,  
190 black, and gray boxes indicate light period, night period, and subjective night period,  
191 respectively.

192

193 **Figure 2. BES1 is required for *LHY* expression in stem cells.**

194 **a**, ChIP-qPCR analyses using WT and *BES1::BES1-GFP* (n = 3, mean  $\pm$  s.e.). *MYB30* and  
195 *ACT2* were used as positive and negative controls, respectively. Green and blue boxes  
196 indicate E-box (CANNTG) and G-box (CACGTG) motifs. TSS: transcriptional start site. **b**,  
197 Expression of *LHY::LUC* using *35S::bes1-D* as an effector in *N. benthamiana* (n = 5, mean  $\pm$   
198 s.e., two-sided student's t-test,  $p < 0.05$ ). *35S::RLUC* was used as a transformation control.  
199 F/R ratio indicates ratio of firefly and renilla luciferase activities. **c**, Immunoblot analyses of  
200 BES1-GFP proteins during VISUAL. Samples were harvested every 8 h, from 24 h before  
201 induction up to 72 h after induction (top) and from 1 to 8 h after induction (bottom). BES1-P  
202 indicates phosphorylated BES1. Asterisks indicate non-specific bands. **d**, Expression patterns  
203 of *LHY* and *CCA1* during VISUAL (n = 3, mean  $\pm$  s.e.). Relative dephosphorylated BES1  
204 levels determined from Fig. 2c are overlaid in yellow. **e**, Expression patterns of *LHY::LUC* in



205 WT and *bes1* during VISUAL ( $n = 15$ , mean  $\pm$  s.e.). White, black, and gray boxes indicate  
206 light period, night period, and subjective night period, respectively. An expression peak in WT  
207 was normalized to 1.

208

209 **Figure 3. WISP pipeline improves temporal resolution of scRNA-seq data.**

210 **a, b**, Bifurcated cell lineage on t-SNE 2D plots predicted by Wishbone, showing sampling  
211 times, and overlaid by expression levels of cell-type-specific markers. Color codes indicate  
212 sampling times from early (green) to late (blue) (**a**) and normalized UMI counts from low  
213 (blue) to high (red) (**b**). **c**, Comparison of marker gene expression patterns aligned by  
214 sampling order, pseudo time (Wishbone), pseudo time (Wishbone-Seurat), and actual time  
215 (WISP). **d**, A hierarchically-clustered heat map visualizing Z-scores of moving averages of  
216 gene expression levels with a window size of 4 h. Green, yellow, red, and blue vertical bars  
217 indicate marker genes for mesophyll cells, stem cells, vascular stem cells, and xylem cells,  
218 respectively. **e**, Reconstruction of 24 h periodicity in time-series scRNA-seq by the WISP  
219 pipeline. Green, yellow, red, and blue bars indicate mesophyll cell, stem cell, vascular stem  
220 cell, and xylem cell states, respectively. **f**, Comparison of full width at half maximum of cell-  
221 type-specific marker expression peaks between the actual time-series scRNA-seq data and the  
222 cpRNA-seq data. White solid lines indicate the median. White broken lines indicate the upper  
223 and lower quartiles.

224

225 **Figure 4. Reconstruction of circadian rhythms prior to cell-fate determination.**

226 **a**, Expression patterns of clock genes in actual time-series scRNA-seq data. Expression of  
227 *ELF4* and *LUX* originates in the stem cell. The first peak time of *ELF4* and *LUX* expression is  
228 highlighted by the pale blue window. **b**, Correlation coefficient between clock genes and cell-  
229 type-specific markers. **c**, GO-term enrichment during cell-fate transition. Genes related to cell

230 cycle are enriched soon after the first peak of *ELF4* and *LUX* expression. The first peak time  
231 of *ELF4* and *LUX* expression is highlighted by the pale blue window. Green, yellow, red, and  
232 blue bars indicate mesophyll cell, stem cell, vascular stem cell, and xylem cell states,  
233 respectively. **d**, Visualization of ChIP-seq data around genes related to clock, cell cycle, cell-  
234 fate determination, and epigenetic regulation (bar = 1 kb). Peak counts of reads are shown. **e**,  
235 Our model proposes that BES1 represses *LHY* expression in stem cells to reconstruct the  
236 circadian clock, resulting in induction of *LUX* expression. *LUX* in the reconstructed clock  
237 modulates key factors for epigenetic regulation, cell-fate determination, and cell cycle,  
238 thereby inducing cell differentiation.

239

## 240 **Methods**

### 241 **Plant material and growth conditions**

242 All wild type and transgenic lines used here were *Arabidopsis thaliana* ecotype Columbia-0  
243 (Col-0). Seeds were surface-sterilized and sown on 0.8% agar plates containing Murashige  
244 and Skoog medium with 0.5% sucrose or liquid media as described previously<sup>7</sup>. Plants were  
245 grown under L/D (12 h light and 12 h dark, 84  $\mu\text{mol m}^{-2} \text{s}^{-1}$ ) conditions at 22°C. For induction  
246 of ectopic vascular cell differentiation, plants were entrained by L/D conditions for 7 days,  
247 although the original protocols<sup>7</sup> called for growth of plants under continuous light (LL)  
248 conditions. Bkinin, 2,4-dichlorophenoxyacetic acid (2,4-D), and kinetin were added to the  
249 eight-day-old plants at ZT0. *cca1-1 lhy-11 toc1-2* and *cca1-1 lhy-11* were provided by  
250 Takafumi Yamashino<sup>21</sup> (Nagoya University), *lux-4 nox* and its parental *CAB2::LUC* were  
251 provided by Dmitri A. Nusinow<sup>22</sup> (Donald Danforth Plant Science Center), *LUX::LUX-*  
252 *GFP/lux-4* was provided by Philip A. Wigge<sup>23</sup> (University of Cambridge).

253

### 254 **Measurement of cell differentiation, cell proliferation, and cell cycles.**

255 For lignin staining, plants were fixed in acetic ethanol fixative (75% glacial acetic acid and  
256 25% ethanol) for 1 day, stained with 20% phloroglucinol in 99.5% ethanol and concentrated  
257 HCl (1:19, v/v) for 1 h, cleared with chloral hydrate/glycerol/H<sub>2</sub>O mixture (8 g of chloral  
258 hydrate in 1 mL of glycerol and 2 mL of H<sub>2</sub>O) for 2 h, and observed under a light microscope.  
259 For quantification of the vascular cell induction ratio, areas for xylem cells in the cotyledons  
260 were calculated using ImageJ.

261 For measurement of stomatal index, 10-day-old plants grown under L/D conditions were  
262 stained with 50 µg/mL of propidium iodide (PI) and observed using a confocal laser scanning  
263 microscope, FV1000 (Olympus) in three square areas of 0.48 mm<sup>2</sup> per cotyledon from 5  
264 cotyledons of 5 independent plants. The stomatal index was calculated as previously  
265 described<sup>24</sup>. Error bars, representing standard errors, were calculated from the results of 5  
266 independent cotyledons.

267 For root elongation measurements, plants were grown vertically under L/D conditions.  
268 Root length was measured at ZT0. For quantification of root meristem size, 7-day-old plants  
269 grown under L/D conditions were stained with 20 µg/mL PI and observed using an FV1000  
270 microscope as described above. Meristematic cell numbers were determined from  
271 observations of the cortical cells, using confocal microscopy images.

272 For DNA ploidy analyses, plants immediately before and 28 h after induction in  
273 VISUAL were used. Cotyledons were chopped using a razor blade in 0.5 mL of nuclei-  
274 extraction buffer (solution A of the Cystain UV precise P; Partec). After filtration through a  
275 30-µm mesh, 2 mL of the staining solution containing DAPI (solution B of the kit) was added.  
276 Ploidy levels were measured using a ploidy analyzer PA (Partec). The lowest peak of WT was  
277 assumed to represent 2C nuclei (C is the haploid DNA content).

278 For quantification of cell-cycle progression, S-phase cells were visualized using Click-iT

279 EdU Alexa Fluor 488 Imaging Kits (Thermo Fisher Scientific) according to the  
280 manufacturer's instructions. At various time points, 7-day-old plants grown under L/D  
281 conditions were transferred to a plate containing identical medium with 10  $\mu$ M EdU and  
282 incubated for 1 h. Incorporation of EdU was terminated by fixing the plants with 4%  
283 paraformaldehyde. EdU incorporated into DNA was stained by Alexa Fluor 488 and observed  
284 using FV1000. The numbers of EdU-positive cells in the cortex were counted using ImageJ.

285 For GUS staining, plants were fixed in 90%(v/v) acetone for 15 min on ice, vacuum-  
286 infiltrated and incubated at 37 °C for 2 h (overnight for *IRX3::GUS*) in the GUS assay  
287 solution containing 100 mM sodium phosphate buffer (pH 7.2), 1 mM potassium-ferrocyanide  
288 (5 mM for *TDR::GUS*), 1 mM potassium-ferricyanide (5 mM for *TDR::GUS*), 0.1%(v/v)  
289 Triton X-100 and 0.5 mg ml<sup>-1</sup> 5-bromo-4-chloro-3-indolyl- $\beta$ -D-glucuronic acid (X-Gluc).  
290 Chlorophylls in the tissue were removed by incubation in 70%(v/v) ethanol.

291

## 292 **Detection of bioluminescence during VISUAL**

293 A cotyledon of a 7-day-old plant grown under L/D conditions was transferred to the liquid  
294 medium as described previously<sup>7</sup>, supplemented with 0.025 mM luciferin (Biosynth) at ZT0,  
295 and incubated under L/D conditions for 2 days. Then, the cotyledon was transferred to the  
296 liquid medium for vascular cell differentiation, containing 0.025 mM luciferin at ZT0 and  
297 incubated under LL conditions for 3 days. For photon counting, the emitted luminescence was  
298 recorded using a photomultiplier-tube-based bioluminescence monitoring system<sup>25</sup>.

299

## 300 **qRT-PCR**

301 Total RNA was extracted using an RNeasy Plant Mini Kit (QIAGEN) and reverse-transcribed  
302 using a Transcriptor First Strand cDNA Synthesis Kit (Roche) according to the manufacturer's  
303 instructions.

304 Real-time gene expression was analyzed with a CFX96 Real-Time PCR Detection  
305 System (Bio-Rad). *UBQ14* were used as an internal control for VISUAL experiments<sup>7</sup>,  
306 respectively. Specific sequences for each primer pair were:  
307 CAB3-RT-F, 5'- ACCCAGAGGCTTTCGCGGAGT;  
308 CAB3-RT-R, 5'- TGC GAAGGCCCATGCGTTGT;  
309 TDR-RT-F, 5'- TGGTGG AAGTTACTTTGAAGGAG;  
310 TDR-RT-R, 5'- TTCAATCTCTGTAAACCACCGTAA;  
311 IRX3-RT-F, 5'- CCTCGGCCACAGCGGAGGAT;  
312 IRX3-RT-R, 5'- CGCCTGCCACTCGAACCAGG;  
313 CCA1-RT-F, 5'- GAGGCTTTATGGTAGAGCATGGCA;  
314 CCA1-RT-R, 5'- TCAGCCTCTTTCTCTACCTTGGAGA;  
315 LHY-RT-F, 5'- ACGAAACAGGTAAGTGGCGACA;  
316 LHY-RT-R, 5'- TGC GTGGAAATGCCAAGGGT;  
317 CYCD3;1-qPCR-Fw, 5'- CGAAGAATTCGTCAGGCTCT;  
318 CYCD3;1-qPCR-Rv, 5'- ACTTCCACAACCGGCATATC;  
319 E2Fc-qPCR-Fw, 5'-; GAGTCTCC-CACGGTTTCAG  
320 E2Fc -qPCR-Rv, 5'-; TCACCATCCGGTACTGTTGC  
321 UBQ14-qPCR-Fw, 5'- TCCGGATCAGGAGAGGTT; and  
322 UBQ14-qPCR-Rv, 5'- TCTGGATGTTGTAGTCAGCAAGA.  
323 The following thermal cycling profile was used,  
324 CAB3, 95°C for 10 s, ~40 cycles of 95°C for 10 s, 62°C for 15 s and 72°C for 15 s;  
325 CCA1, 95°C for 60 s, ~40 cycles of 95°C for 10 s, 60°C for 15 s and 72°C for 7 s;  
326 IRX3, 95°C for 60 s, ~40 cycles of 95°C for 10 s, 64.5°C for 15 s and 72°C for 10 s; and  
327 TDR, LHY, CYCD3;1, E2Fc, and UBQ14, 95°C for 60 s, ~40 cycles of 95°C for 10 s, 60°C  
328 for 15 s and 72°C for 15 s.

329 Each sample was run in technical triplicate to reduce experimental errors. Error bars,  
330 representing standard errors, were calculated from the results of biological triplicates.

331

### 332 **scRNA-seq and cpRNA-seq**

333 For scRNA-seq, a cotyledon was placed adaxial side down on a glass slide, and fixed with an  
334 adhesive tape, e.g., cellophane tape. Then the center of cotyledon was cut using a razor blade,  
335 and with the aid of a microscope, the contents of a single cell were collected using a glass  
336 capillary. Samples were subjected to UMI-tagged sequencing using a NextSeq 500 system  
337 (Illumina). The process closely followed the method described by Kubo *et al*<sup>10</sup>. For cpRNA-  
338 seq, total RNA was extracted using an RNeasy Plant Mini Kit and subjected to UMI-tagged  
339 sequencing, as for scRNA-seq, except that 10 cycles of the PCR amplification step were  
340 required. scRNA-seq data was normalized together with cpRNA-seq by DESeq<sup>26</sup>.

341

### 342 **WISP pipeline**

343 To identify scRNA-seq data related to the xylem cell lineage, Wishbone was performed as  
344 previously described<sup>11</sup>. Samples after induction in VISUAL were subjected to Wishbone. The  
345 first and third components of principle component analysis (PCA) were used for t-SNE. The  
346 xylem lineage was selected according to the expression of xylem cell marker genes on the t-  
347 SNE plots.

348 Clustering of cells was performed using the Seurat R package<sup>12</sup>. In brief, digital gene  
349 expression matrices were column-normalized and log-transformed. To obtain a landmark gene  
350 set for Seurat, we divided all genes in cpRNA-seq data into 17 groups according to the peak  
351 expression time of each gene. The 17 genes showing the highest correlation coefficient with  
352 scRNA-seq data in each respective group were selected as landmark genes. In addition to the  
353 17 genes, cell-type-specific markers (*CAB3*, *LHCB2.1*, *TDR*, *AtHB8*, *IRX3*, *IRX8*, and

354 *SEORI*) were also selected as landmark genes. In total, 24 genes were used as a landmark  
355 gene set for Seurat.

356 Finally, we selected the genes whose correlation coefficient between scRNA-seq and  
357 cpRNA-seq was more than 0.5. Among the selected genes, 2,217 genes whose sum total of  
358 expression levels in the scRNA-seq data were higher than the value equivalent to ten times  
359 the cell numbers were subjected to PeakMatch with the following parameters:  $T = 2$ ,  $last = 0$ ,  
360  $intv = 1$ ,  $inter = 7$ .

361

### 362 **Overview of the PeakMatch algorithm**

363 Let  $Z$  be the set of whole genes under consideration. Discretizing pseudo and actual times  
364 into integers for simplicity, we denote by  $P = \{1, \dots, m\}$  and  $A = \{1, \dots, n\}$  the sets of  
365 available pseudo and actual times, respectively. Suppose that, for each gene  $z \in Z$ , we are  
366 given pseudo time-series based scRNA-seq data  $S_z = (s_{z,1}, \dots, s_{z,m})$  and actual time-series  
367 based cpRNA-seq data  $C_z = (c_{z,1}, \dots, c_{z,n})$ , where  $s_{z,p} \in S_z$  and  $c_{z,a} \in C_z$  represent the  
368 gene  $z$ 's expression levels at a pseudo time  $p$  in the scRNA-seq data, and at an actual time  $a$  in  
369 the cpRNA-seq data, respectively.

370 To estimate the actual times of gene expressions in the scRNA-seq data, we would like to  
371 find pairs  $(p, a) \in P \times A$  of pseudo and actual times so that the expression levels  $s_{z,p}$  and  
372  $c_{z,a}$  are likely to be “comparable” for many genes  $z \in Z$ . Once such pairs  $(p, a)$  are found,  
373 we may estimate the actual time of  $s_{z,p}$  by that of  $c_{z,a}$ .

374 The point is that, among the observed gene expression levels, “peaks” are the most  
375 important phenomena. Then it is desired that a peak in  $S_z$  and a peak in  $C_z$  should be  
376 matched. It is also required that the pseudo time order should be preserved in the time pairs.  
377 To be more precise, whenever a pseudo time  $p$  is matched to an actual time  $a$ , any pseudo

378 time  $p' > p$  should be matched to an actual time  $a' > a$ .

379 We formulated the problem of finding such time pairs as the maximum weighted non-  
380 crossing matching (MWNCM) problem for a bipartite graph. The problem is polynomially  
381 solvable<sup>27</sup>, meaning that it is efficiently solvable from the standpoint of the theory of  
382 computational complexity.

383 We took the bipartite graph so that one vertex subset was the pseudo time set  $P$  and the  
384 other vertex subset was the actual time set  $A$ . For the edge set, we considered all possible  
385 pairs  $(p, a) \in P \times A$ , where we determined the weight of an edge  $(p, a)$  heuristically by  
386 how the pseudo time  $p$  and the actual time  $a$  were comparable peaks. We determined the  
387 weight of an edge  $(p, a)$  as follows. For each gene  $z \in Z$ , we decided whether or not the  
388 value  $s_{z,p}$  (*resp.*,  $c_{z,a}$ ) was within a “peak area” in  $S_z$  (*resp.*,  $C_z$ ). We considered that  
389  $s_{z,p}$  (*resp.*,  $c_{z,a}$ ) was within a peak area if it was significantly larger than a general trend of  
390  $S_z = (s_{z,1}, \dots, s_{z,m})$  (*resp.*,  $C_z = (c_{z,1}, \dots, c_{z,n})$ ), which was estimated by an exponential  
391 moving average. We set the weight of  $(p, a)$  to a larger value if both  $s_{z,p}$  and  $c_{z,a}$  are  
392 among peak areas for more genes.

393 Given the scRNA-seq and cpRNA-seq data, the algorithm PeakMatch constructed the  
394 bipartite graph, derived an MWNCM for it, and estimated the actual times of all pseudo times  
395 in  $P$  based on the derived MWNCM.

396 For more details and python-based programs, see [https://github.com/endo-](https://github.com/endo-lab/PeakMatch)  
397 [lab/PeakMatch](https://github.com/endo-lab/PeakMatch).

398

### 399 **Plasmid construction**

400 For luciferase reporter constructs, the NOS terminator was amplified by PCR using the  
401 following primers:



402 nosT-F, 5'-GCCGCACTCGAGATATCTAGAATCGTTCAAACATTTGGCAA; and

403 nosT-R, 5'-TACAAGAAAGCTGGGTCTAGAGATCTAGTAACATAGATGAC.

404 The amplified fragment was cloned into the XbaI site of pENTR1A (no ccdB) using an  
405 In-Fusion HD Cloning Kit (TaKaRa). In the same way, the coding sequence of LUC+ was  
406 amplified and cloned into the XhoI-EcoRV site of the plasmid using the following primers:

407 LUC-XhoI-F, 5'-TTCGCGGCCGCACTCGAGATGGAAGACG; and

408 LUC-EcoRV-R, 5'-TGAACGATTCTAGATATCTTACACGGCGATCTTTCCGC.

409 The resulting pENTR1A (LUC-nosT) was used for *LHY::LUC*. The promoter of *LHY*  
410 was amplified from Col-0 genomic DNA using the following primers:

411 LHY-pro-F (XhoI), 5'-CGCGGCCGCACTCGATTTTGGGAATAATTTTCGGTTATTTTC; and

412 LHY-pro-R (XhoI), 5'-ATCCGCGGATCTCGAAACAGGACCGGTGCA.

413 The amplified fragment was cloned into the XhoI site of pENTR1A (LUC-nosT). After  
414 sequence verification, the plasmid was recombined with pFAST-G01<sup>28</sup>, introduced into Col-0  
415 plants, and transgenic plants were selected by fluorescence of T1 seeds.

416 For *IRX3::GUS*, the promoter of *IRX3* was amplified from Col-0 genomic DNA using  
417 the following primers:

418 IRX3p-Fw (XhoI), 5'-CGCGGCCGCACTCGATCGAGAGCCCGA; and

419 IRX3p-Rv (XhoI), 5'-GTCTAGATATCTCGAAGGGACGGCCGGAGATTAGCAGCGA.

420 The amplified fragment was cloned into the XhoI site of pENTR1A (no ccdB). After  
421 sequence verification, this plasmid was recombined with pGWB3<sup>29</sup>, and introduced into Col-0  
422 plants.

423 For *BES1::BES1-GFP*, the genomic DNA fragment of BES1 containing the 2 kb  
424 promoter sequence and the 1 kb downstream sequence from the stop codon was amplified  
425 from Col-0 genomic DNA using the following primers:

426 CACC-pBES1\_2k\_F, 5'-CACCTCTCAACCTGCTCGGT; and

427 gBES1-R, 5'- CTCTGATGTGGAGTCAATG.

428 The amplified fragment was cloned into the pENTR/D-TOPO (Thermo Fisher  
429 Scientific). After sequence verification, this plasmid was recombined with pGWB1<sup>29</sup>. The  
430 resulting pGWB1-gBES1 was linearized by PCR using the following primers:

431 gBES1-C\_inverse-F, 5'- TGAGATGAAGTATACATGAACCTG; and

432 bes1\_R\_nonstop, 5'- ACTATGAGCTTTACCATTCCAAGCG.

433 Then, sGFP fragment was amplified using the following primers:

434 sGFP\_for-gBES1-C\_F, 5'- GGTAAGCTCATAGTATGGTGAGCAAGGGCG; and

435 sGFP\_for-gBES1-C\_R, 5'- GTATACTTCATCTCACTTGTACAGCTCGTCCATG.

436 The sGFP fragment was inserted just before the stop codon of BES1 by fusion of the two  
437 fragments using In-Fusion HD Cloning Kit. After sequence verification, this plasmid was  
438 introduced into the *bes1-3* mutant.

439 For transactivation assay constructs, the coding sequences of *bes1-D(L)* from cDNA of  
440 the *bes1-D* mutant and *RLUC* from the vector pRL vector (Promega) were amplified by PCR  
441 using the following primers:

442 bes1-D(L)-F, 5'- GGACTCTAGAGGATCATGAAAAGATTCTTCTATAATTCC;

443 bes1-D(L)-R, 5'- CGGTACCCGGGGATCTCAACTATGAGCTTTACCATTCC;

444 RLUC-F, 5'- GGACTCTAGAGGATCATGACTTCGAAAGTTTATGATCC; and

445 RLUC-R, 5'-CGGTACCCGGGGATCTTATTGTTTCATTTTTGAGAAC.

446 The amplified fragments were cloned into the BamHI site of pPZP211/NP/35S-nosT<sup>30</sup>  
447 using an In-Fusion HD Cloning Kit.

448

#### 449 **Western blotting**

450 Plants expressing *BES1::BES1-GFP* were harvested every 8 h from 24 h before induction in  
451 VISUAL, up to 72 h after induction. Approximately 50 mg of seedlings were ground into a

452 fine powder in liquid nitrogen with a mortar and pestle, mixed with equal volumes of  
453 2×Laemmli sample buffer (100 mM Tris-HCl(pH 6.8), 4%(w/v) SDS, 10%(v/v) 2-  
454 mercaptoethanol, and 20%(v/v) glycerol) and boiled at 95°C for 5 min. Samples were  
455 separated by SDS-PAGE on a 7.5% acrylamide gel, and transferred onto polyvinylidene  
456 fluoride membranes (Bio-Rad Laboratories). For the primary antibody, polyclonal anti-GFP  
457 (MBL-598) was diluted 1:2,000. For the secondary antibody, ECL Rabbit IgG, HRP-linked  
458 whole Ab (GE Healthcare) was diluted 1:10,000. Blots were visualized with ECL Prime  
459 reagent (GE Healthcare) and ImageQuant LAS 4010 (GE Healthcare).

460

#### 461 **ChIP-qPCR and ChIP-seq**

462 Chromatin immunoprecipitation assays using *BES1::BES1-GFP/bes1-3* and *LUX::LUX-*  
463 *GFP/lux-4* were performed as described<sup>31</sup> with modifications. Briefly, 600 mg of seedlings at  
464 8 h after induction in VISUAL were fixed in PBS containing 1% paraformaldehyde for 10  
465 min at room temperature, and nuclei and chromatin were isolated. The isolated chromatin was  
466 sheared with a Covaris S220 sonicator under these parameters: 4–6°C, 175 W peak power,  
467 5% duty factor, 200 cycles/burst, for 50 s of treatment. To immunoprecipitate chromatin, 10  
468 µL of anti-GFP antibody (MBL-598) and 50 µL of Dynabeads Protein G (Thermo Fisher  
469 Scientific) were used. The precipitated samples were subjected to qPCR or library preparation  
470 for ChIP-seq. MYB30<sup>31</sup> was used as a positive control for ChIP with BES1. For ChIP-qPCR,  
471 specific sequences for each primer pair were:

472 LHYp-ChIP-1F, 5'- GATTCGGGTAGTTCAGTTCTTCG;

473 LHYp-ChIP-1R, 5'- GGTTAGTTCGGTTCGGTTCTAGG;

474 LHYp-ChIP-2F, 5'- CACCGTACCCACTTGTTTAGTCG;

475 LHYp-ChIP-2R, 5'- CGAGCCAGAAGCTTCAATGTG;

476 LHYp-ChIP-3F, 5'- GGCTCGTAGAGAAGCAACTTGAG;

477 LHYp-ChIP-3R, 5'- AGTCATCGCAGATCGACACG;

478 LHYp-ChIP-4F, 5'- GTGGATTTCGTTTGGGTGAGG;

479 LHYp-ChIP-4R, 5'- AACAGTCGCTGCTTCTCCAG.

480 MYB30-ChIP-F, 5'-AGGTATTTTACGCTGGAAAATGTGT;

481 MYB30-ChIP-R, 5'- GAATCATCATAATAAGTATGGAGGTG;

482 ACT2-ChIP-F, 5'- CGTTTCGCTTTCCTTAGTGTTAGCT; and

483 ACT2-ChIP-R, 5'- AGCGAACGGATCTAGAGACTCACCTTG.

484 The following thermal cycling profile was used for all the primers: 95°C for 60 s, ~40

485 cycles of 95°C for 10 s, 60°C for 45 s.

486

487 For ChIP-seq, the sequence libraries were prepared using a TruSeq ChIP Sample Preparation

488 Kit v2 (Illumina), and sequenced using an Illumina NextSeq 500 system with a 75-nt single-

489 end sequencing protocol. The sequence reads were mapped to the TAIR10 *Arabidopsis*

490 genome sequence by HISAT2<sup>33</sup> with default parameters. Peaks were identified by MACS2<sup>34</sup>,

491 using the matching INPUT control with the genome size parameter “-g 1.3e8”.

492

### 493 **Transactivation assay**

494 *Agrobacterium* cultures carrying plasmids for the transactivation assay were grown overnight

495 at 28°C, collected by centrifugation, and adjusted to an OD600 of 0.4 with infiltration buffer

496 (10 mM MES(pH 5.6), 10 mM MgCl<sub>2</sub>, 150 μM acetosyringone, and 0.02% Silwet-L77). Cells

497 were kept at 28°C in the dark for 1 to 2 h and then infiltrated into the abaxial air spaces of 4-

498 week-old *N. benthamiana* plants grown under L/D conditions at ZT0. After infiltration, plants

499 were kept under L/D conditions for 36 h and harvested at ZT12. The transactivation assay was

500 performed with a Dual-Luciferase Reporter Assay System (Promega) according to the

501 manufacturer's instructions.

502

### 503 **Data Availability**

504 Code for PeakMatch is available online at <https://github.com/endo-lab/PeakMatch>. Other  
505 related, relevant lines and data supporting the findings of this study are available from the  
506 corresponding authors upon reasonable request.

507 Sequence data from this article can be found in The Arabidopsis Information Resource  
508 (TAIR) databases (<https://www.arabidopsis.org>) under the following accession numbers:  
509 UBQ14 (At4g02890), ACT2 (At3g18780), LHCB2.1 (At2g05100), CAB2 (At1g29920),  
510 CAB3 (At1g29910), AtHB8 (At4g32880), TDR (At5g61480), IRX3 (At5g17420), IRX8  
511 (At5g54690), SEOR1 (At3g01680), COR15A (At2g42540), ADH1 (At1g77120), RD29A  
512 (At5g52310), OBP1 (At3g50410), ACS6 (At4g11280), MYB30 (At3g28910), CCA1  
513 (At2g46830), LHY (At1g01060), PRR3 (At5g60100), PRR5 (At5g24470), PRR7  
514 (At5g02810), PRR9 (At2g46790), TOC1 (At5g61380), ELF3 (At2g25930), ELF4  
515 (At2g40080), LUX/PCL1 (At3g46640), BOA/NOX (At5g59570), GI (At1g22770), BES1  
516 (At1g19350), CYCD3;1 (At4g34160), E2Fc (At1g47870), and RBR (At3g12280).

517

518

### 519 **References**

- 520 1. Li, S. & Zhang, L. Circadian control of global transcription. *BioMed Res. Int.* **2015**,  
521 187809 (2015).
- 522 2. Buhr, E. D. & Takahashi, J. S. Molecular components of the Mammalian circadian clock.  
523 *Handb. Exp. Pharmacol.* **2013**, 3-27 (2013).
- 524 3. Endo, M., Shimizu, H., Nohales, M. A., Araki, T. & Kay, S. A. Tissue-specific clocks in  
525 *Arabidopsis* show asymmetric coupling. *Nature* **515**, 419–422 (2014).

- 526 4. Yagita, K. et al. Development of the circadian oscillator during differentiation of mouse  
527 embryonic stem cells *in vitro*. *Proc. Natl Acad. Sci. USA* **107**, 3846–3851 (2010).
- 528 5. Yu, X. et al. TH17 cell differentiation is regulated by the circadian clock. *Science* **342**,  
529 727–730 (2013).
- 530 6. Aihara, K., Naramoto, S., Hara, M. & Mizoguchi, T. Increase in vascular pattern  
531 complexity caused by mutations in *LHY* and *CCA1* in *Arabidopsis thaliana* under  
532 continuous light. *Plant Biotechnol.* **31**, 43–47 (2014).
- 533 7. Kondo, Y. et al. Vascular Cell Induction Culture System Using Arabidopsis Leaves  
534 (VISUAL) reveals the sequential differentiation of sieve element-like cells. *Plant Cell* **28**,  
535 1250–1262 (2016).
- 536 8. Kondo, Y. et al. Plant GSK3 proteins regulate xylem cell differentiation downstream of  
537 TDIF-TDR signalling. *Nat. Commun.* **5**, 3504 (2014).
- 538 9. Yu, X. et al. A brassinosteroid transcriptional network revealed by genome-wide  
539 identification of BES1 target genes in *Arabidopsis thaliana*. *Plant J.* **65**, 634–646 (2011).
- 540 10. Kubo, M. et al. Single-cell transcriptome analysis of Physcomitrella leaf cells during  
541 reprogramming using microcapillary manipulation. *Nucleic Acids Res.*, doi:  
542 10.1093/nar/gkz181 (2019).
- 543 11. Setty, M. et al. Wishbone identifies bifurcating developmental trajectories from single-cell  
544 data. *Nat. Biotechnol.* **34**, 637–645 (2016).
- 545 12. Satija, R., Farrell, J. A., Gennert, D., Schier, A. F. & Regev, A. Spatial reconstruction of  
546 single-cell gene expression data. *Nat. Biotechnol.* **33**, 495–502 (2015).
- 547 13. Skirycz, A. et al. The DOF transcription factor OBP1 is involved in cell cycle regulation  
548 in *Arabidopsis thaliana*. *Plant J.* **56**, 779–792 (2008).
- 549 14. Ortega-Martinez, O., Pernas, M., Carol, R. J. & Dolan, L. Ethylene modulates stem cell  
550 division in the *Arabidopsis thaliana* root. *Science* **317**, 507–510 (2007).

- 551 15. Sun, N. et al. Inference of differentiation time for single cell transcriptomes using cell  
552 population reference data. *Nat. Commun.* **8**, 1856 (2017).
- 553 16. Voß, U. et al. The circadian clock rephases during lateral root organ initiation in  
554 *Arabidopsis thaliana*. *Nat. Commun.* **6**, 7641 (2015).
- 555 17. Fukuda, H., Ukai, K. & Oyama, T. Self-arrangement of cellular circadian rhythms through  
556 phase-resetting in plant roots. *Phys. Rev. E Stat. Nonlin. Soft Matter Phys.* **86**, 041917  
557 (2012).
- 558 18. Kuwabara, A. & Grissem, W. *Arabidopsis* RETINOBLASTOMA-RELATED and  
559 Polycomb group proteins: cooperation during plant cell differentiation and development.  
560 *J. Exp. Bot.* **65**, 2667-2676 (2014).
- 561 19. Taylor-Teeples, M. et al. An *Arabidopsis* gene regulatory network for secondary cell wall  
562 synthesis. *Nature* **517**, 571–575 (2015).
- 563 20. Ryu, K. H., Huang, L., Kang, H. M. & Schiefelbein, J. Single-cell RNA sequencing  
564 resolves molecular relationships among individual plant cells. *Plant Physiol.* **179**, 1444–  
565 1456 (2019).

566

567

## 568 **Acknowledgements**

569 We thank T. Koto, T. Kondo and Y. Sando for technical assistance, J.A. Hejna for English  
570 proofreading, N. Mochizuki for the gift of *CAB2::GUS* seeds, T. Demura for the gift of  
571 *TDR::GUS* seeds, T. Nakano for the gift of *bes1-D* seeds, and N. Takahashi, T. Sugiyama and  
572 M. Umeda for advising ploidy experiments. This work was supported by JST PRESTO grant  
573 888067 (to M.E.); by JSPS KAKENHI (grant numbers 15H05958, 16H01240, 17K19392,  
574 18H04781, and 18H02461 (to M.E.), 18K14732 (to K.I.), and 17J08107 (to K.T.)); by  
575 ISHIZUE 2017 of the Kyoto University Research Development Program, grants from the

576 Yamada Science Foundation, Senri Life Science Foundation, LOTTE Foundation, Daiichi  
577 Sankyo Foundation of Life Science, The Takeda Science Foundation, and the Nakajima  
578 Foundation, the Sekisui Chemical Grant Program, SEI Group CSR Foundation, SECOM  
579 Science and Technology Foundation, and Tokyo Kasei Chemical Promotion foundation (to  
580 M.E.); by Grants-in-Aid for Scientific Research on Priority Area 25113005 (to T.A.). Sample  
581 preparation for RNA-seq and ChIP-seq was performed at the Medical Research Support  
582 Center, Graduate School of Medicine, Kyoto University.

583

584

### 585 **Author contributions**

586 K.T., K.I., K.B., H.S., and K.U. performed the gene expression analysis and phenotypic  
587 analysis. K.H. and K.T. performed the WISP analysis. T.S., M.K., K.T., H.S., and M.E.  
588 performed the single-cell RNA-seq analysis. K.I. performed the ChIP assay. Y.K. assisted  
589 with VISUAL experiments. M.S. established *BES1::BES1-GFP* plants. K.T., K.I., and M.E.  
590 wrote the manuscript. M.E. directed and supervised the research with the support of T.A. and  
591 H.F.

592

593

### 594 **Competing interests**

595 The authors declare no competing interests.

596

### 597 **Supplementary Information**

598 Supplementary Figs 1–4 and Supplementary Table 2.

599

### 600 **Supplementary Table 1.**



601 Summary of single-cell transcriptome data.

602

603 **Supplementary Table 3.**

604 Reconstructed actual time-series of single-cell transcriptome data using the WISP pipeline.

605

606 **Supplementary Table 4.**

607 Summary of peak calling using the MACS2 and gene annotation of putative LUX target  
608 genes.

609

610 **Supplementary Video 1. Extracting a single-cell content using a glass capillary.**

611

612 **Supplementary Figure 1. Circadian clock associated with cell differentiation in VISUAL  
613 and non-VISUAL.**

614 **a–c**, Phenotypic analyses of vascular bundle development in cotyledons (**a**,  $n = 100$ , chi-  
615 square test,  $p < 0.05$ ), guard cells (**b**,  $n = 5$ , mean  $\pm$  s.e.), and main roots (**c**,  $n = 10$ , mean  $\pm$   
616 s.e.) using WT and clock mutants. Abnormal leaf vein patterns were categorized according to  
617 the numbers of areoles (**a**). Stomatal index was calculated as previously described<sup>24</sup> (**b**). **d,e**,  
618 GUS staining of cell-type-specific markers (**d**) and the vascular cell induction ratio (**e**) during  
619 VISUAL. Representative photos of lignin staining are below (**e**, bar = 1 mm). **f**, Expression  
620 patterns of cell-type-specific markers in *lux nox* and corresponding WT during VISUAL ( $n =$   
621 3, mean  $\pm$  s.e.). Green, red, and blue lines indicate marker genes for mesophyll cells (*CAB3*),  
622 vascular stem cells (*TDR*), and xylem cells (*IRX3*), respectively. White, black, and gray boxes  
623 indicate light period, night period, and subjective night period, respectively. Peak expression  
624 levels of each respective gene in WT were normalized to 1.

625

626 **Supplementary Figure 2. Single-cell transcriptome analysis using microcapillary in**  
627 ***Arabidopsis*.**

628 **a**, Set up for microcapillary manipulation to physically extract the contents of individual cells  
629 using glass capillaries. **b**, Assessment of scRNA-Seq data during VISUAL. Due to the  
630 stochastic cell differentiation in VISUAL, the values of Pearson's correlation coefficient  
631 between samples in the same time points become smaller, suggesting the existence of various  
632 types of cells in later time points. **c**, Estimation of total RNA amounts in a single cell. Plants  
633 were grown in liquid media and solid agar media, and then isolated cells were analysed as  
634 protoplasts. Averaged amounts of total RNA in single cells were comparable ( $n = 10$ , mean  $\pm$   
635 s.e.). White solid lines indicate the median. White broken lines indicate the upper and lower  
636 quartiles. **d**, Estimation of mRNA stability during glass capillary-based sampling. In our  
637 protocol, harvested single-cell contents were reverse transcribed within 60 s. Even when  
638 samples were kept in the glass capillary for 600 s, the values of Pearson's correlation  
639 coefficient between samples from the same time points were almost the same. **e**, Comparison  
640 of stress-induced genes expression between cpRNA-seq and scRNA-seq ( $n = 2$  for cpRNA-  
641 seq,  $n = 9$  for scRNA-seq, mean  $\pm$  s.e.). Lower expression levels of *ADH1* and *COR15A* in  
642 scRNA-seq indicate that the process of harvesting single cells does not induce stress  
643 responses.

644  
645 **Supplementary Figure 3. Reconstruction of actual time-series by the WISP pipeline.**

646 **a**, Separation of xylem and phloem trajectories by Wishbone. Normalized gene expression  
647 levels of marker genes for xylem (*IRX3* and *IRX8*) and phloem (*APL* and *SEORI*) in each  
648 branch are shown. **b**, Hierarchical clustering of pseudo time-series data shows discriminatory  
649 gene sets. Green, yellow, red, and blue bars indicate the clusters of mesophyll cell, stem cell,  
650 vascular stem cell, and xylem cell states. Marker genes for each cell type are denoted at the

651 right. **c**, A conceptual overview of PeakMatch. The timing of significant gene expression  
652 peaks can be comparable between pseudo time-series scRNA-seq data and actual time-series  
653 cpRNA-seq data. **d**, A heat map visualizing Z-scores of moving average of each clock gene  
654 expression level and their sum total with window size of 4 h. A double-headed arrow indicates  
655 a period of time when clock genes cease their rhythmic expression in the stem cell states. In **d**  
656 and **e**, green, yellow, red, and blue horizontal bars indicate periods of time corresponding to  
657 mesophyll cell, stem cell, vascular stem cell, and xylem cell states, respectively.

658

659 **Supplementary Figure 4. Circadian clock regulates cell-cycle progression.**

660 **a**, FDR distributions of genes related to G<sub>1</sub>-S transition in the candidate LUX target genes. **b**,  
661 Expression patterns of *CYCD3;1* and *E2Fc* during VISUAL in *lux nox* and corresponding WT  
662 (n = 3, mean ± s.e.). Peak expression levels of each respective gene in WT were normalized to  
663 1. White, black, and gray boxes indicate light period, night period, and subjective night  
664 period, respectively. **c**, DNA ploidy analyses before and 28 h after induction using WT and  
665 clock mutants (n = 10, mean). Left, DNA ploidy distribution with or without VISUAL. Right,  
666 bar graphs of the ratio of 2C and 32C ploidy levels. Clock mutants show increased polyploidy  
667 levels probably due to defects in cell-cycle progression. **d**, Incorporation assays of EdU in  
668 root meristematic regions using WT and clock mutants under L/D conditions (n = 5, mean ±  
669 s.e.). **e**, Comparison of meristematic cell numbers in the root apical meristem using WT and  
670 clock mutants (n = 5, mean ± s.e., bar = 10 μm). Representative photos of root meristematic  
671 regions are on the right side. Arrowheads indicate the initial and end points of the  
672 meristematic zone. **f**, Re-analyses of scRNA-seq data derived from root tissues<sup>20</sup>. Top and  
673 second from the top, t-SNE 2D plots overlaid by expression levels of *BES1* and *LUX*. Second  
674 from the bottom, correlation coefficient between *BES1* and *LUX* expression levels. Bottom, t-  
675 SNE 2D plots overlaid by enrichment scores of the GO-term cell cycle. Genes related to cell

676 cycle are enriched in the cells showing high expression levels of both *BESI* and *LUX*.

677

## 678 **References for Methods**

679 21. Niwa, Y. et al. Genetic linkages of the circadian clock-associated genes, *TOC1*, *CCA1* and  
680 *LHY*, in the photoperiodic control of flowering time in *Arabidopsis thaliana*. *Plant Cell*  
681 *Physiol.* **48**, 925–937 (2007).

682 22. Helfer, A. et al. *LUX ARRHYTHMO* encodes a nighttime repressor of circadian gene  
683 expression in the *Arabidopsis* core clock. *Curr. Biol.* **21**, 126–133 (2011).

684 23. Ezer, D. et al. The evening complex coordinates environmental and endogenous signals in  
685 *Arabidopsis*. *Nat. Plants* **3**, 17087 (2017).

686 24. Kang, C. Y., Lian, H. L., Wang, F. F., Huang, J. R. & Yang, H. Q. Cryptochromes,  
687 phytochromes, and COP1 regulate light-controlled stomatal development in *Arabidopsis*.  
688 *Plant Cell* **21**, 2624–2641 (2009).

689 25. Golden, S. S., Ishiura, M., Johnson, C. H. & Kondo, T. Cyanobacterial circadian rhythms.  
690 *Annu. Rev. Plant Physiol. Plant Mol. Biol.* **48**, 327–354 (1997).

691 26. Anders, S & Huber, W. Differential expression analysis for sequence count data. *Genome*  
692 *Biol.* **11**, R106 (2010).

693 27. Malucelli, F., Ottmann, T. & Pretolani, D. Efficient labelling algorithms for the maximum  
694 noncrossing matching problem. *Discrete Appl. Math.* **47**, 175–179 (1993).

695 28. Shimada, T. L., Shimada, T. & Hara-Nishimura, I. A rapid and non-destructive screenable  
696 marker, FAST, for identifying transformed seeds of *Arabidopsis thaliana*. *Plant J.* **61**,  
697 519–528 (2010).

698 29. Nakagawa, T. et al. Development of series of gateway binary vectors, pGWBs, for  
699 realizing efficient construction of fusion genes for plant transformation. *J. Biosci. Bioeng.*  
700 **104**, 34–41 (2007).

- 701 30. Nishimura, T., Yokota, E., Wada, T., Shimmen, T. & Okada, K. An *Arabidopsis* *ACT2*  
702 dominant-negative mutation, which disturbs F-actin polymerization, reveals its distinctive  
703 function in root development. *Plant Cell Physiol.* **44**, 1131–1140 (2003).
- 704 31. Yamaguchi, N. et al. PROTOCOLS: Chromatin immunoprecipitation from *Arabidopsis*  
705 tissues. *Arabidopsis Book* **12**, e0170, doi:10.1199/tab.0170 (2014).
- 706 32. Li, L. et al. *Arabidopsis* MYB30 is a direct target of BES1 and cooperates with BES1 to  
707 regulate brassinosteroid-induced gene expression. *Plant J.* **58**, 275–286 (2009).
- 708 33. Kim, D., Langmead, B. & Salzberg, SL. HISAT: a fast spliced aligner with low memory  
709 requirements. *Nat. Methods* **12**, 357–360 (2015).
- 710 34. Zhang, Y. et al. Model-based analysis of ChIP-Seq (MACS). *Genome Biol.* **9**, R137  
711 (2008).
- 712

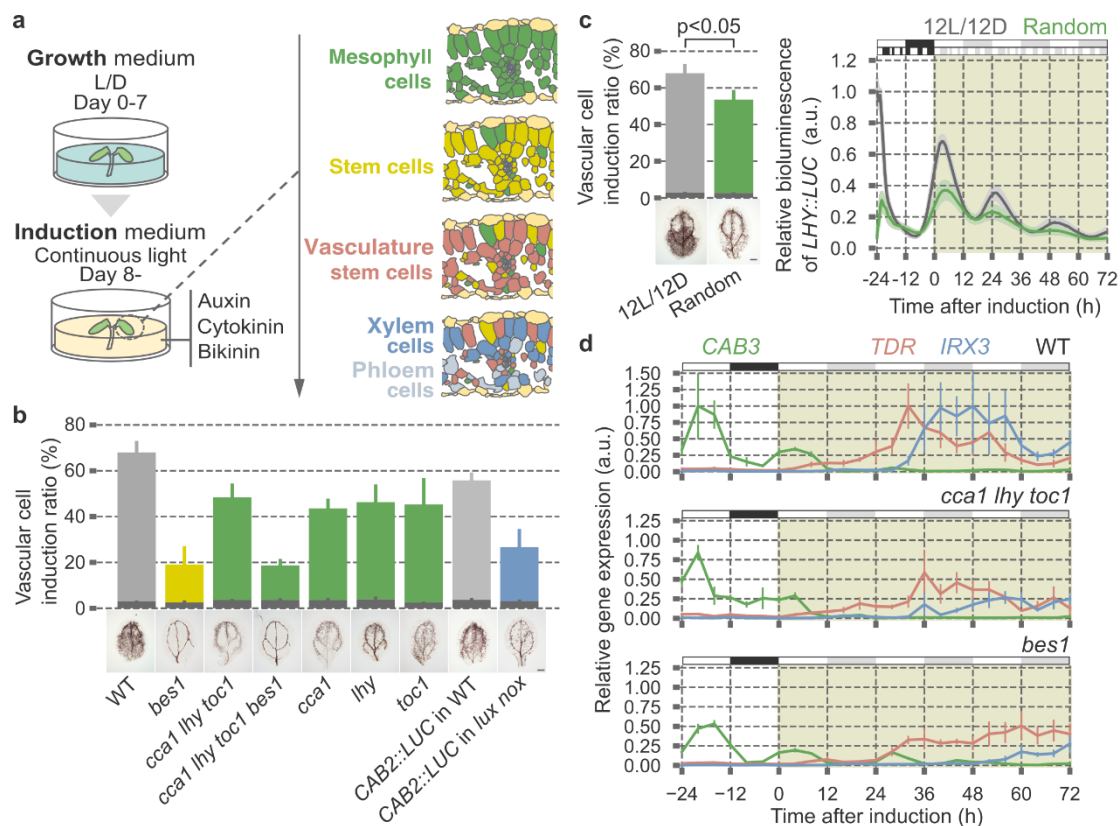

### Figure 1. The plant circadian clock affects cell differentiation.

**a**, Schematic of ectopic vascular cell induction with VISUAL. **b**, Lignin stained xylem cell density in WT, *bes1*, and clock mutants after induction. Light gray, green, and yellow bars indicate ectopically induced xylem cells. Dark gray bars indicate endogenous xylem cells ( $n = 5$ , mean  $\pm$  s.e.). Representative photos of lignin staining are below (bar = 1 mm). **c**, Perturbation of endogenous circadian rhythms by random light/dark periods (2L3D1L1D3L1D1L2D3L2D2L3D, total 12L12D per 24 h) inhibits vascular cell differentiation with VISUAL. Left, lignin stained xylem cell density and representative photos ( $n = 5$ , mean  $\pm$  s.e., bar = 1 mm, two-sided student's t-test,  $p < 0.05$ ). Right, expression patterns of *LHY::LUC* during VISUAL under normal and random light/dark conditions ( $n = 10$ , mean  $\pm$  s.e.). **d**, Expression patterns of cell-type-specific markers during VISUAL in WT, *cca1 lhy toc1*, and *bes1* ( $n = 3$ , mean  $\pm$  s.e.). Green, red, and blue lines indicate marker genes for mesophyll cells (*CAB3*), vascular stem cells (*TDR*), and xylem cells (*IRX3*), respectively. Expression peaks of each respective gene in WT were normalized to 1. White, black, and gray boxes indicate light period, night period, and subjective night period, respectively.

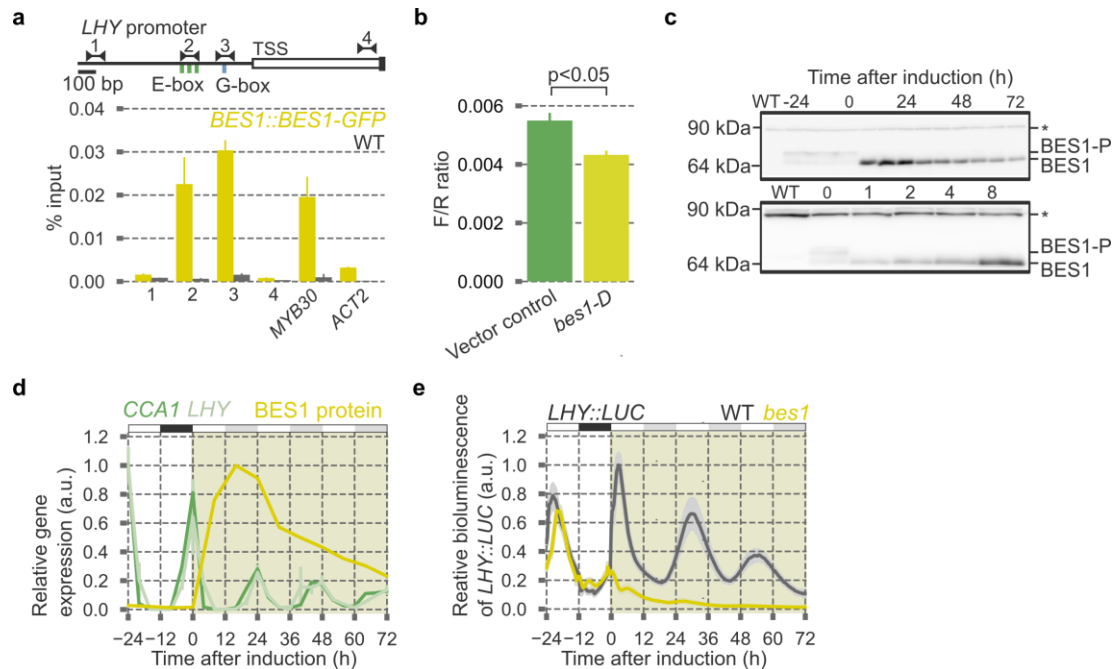

**Figure 2. BES1 is required for *LHY* expression in stem cells.**

**a**, ChIP-qPCR analyses using WT and *BES1::BES1-GFP* ( $n = 3$ , mean  $\pm$  s.e.). *MYB30* and *ACT2* were used as positive and negative controls, respectively. Green and blue boxes indicate E-box (CANNTG) and G-box (CACGTG) motifs. TSS: transcriptional start site. **b**, Expression of *LHY::LUC* using *35S::bes1-D* as an effector in *N. benthamiana* ( $n = 5$ , mean  $\pm$  s.e., two-sided student's t-test,  $p < 0.05$ ). *35S::RLUC* was used as a transformation control. F/R ratio indicates ratio of firefly and renilla luciferase activities. **c**, Immunoblot analyses of BES1-GFP proteins during VISUAL. Samples were harvested every 8 h, from 24 h before induction up to 72 h after induction (top) and from 1 to 8 h after induction (bottom). BES1-P indicates phosphorylated BES1. Asterisks indicate non-specific bands. **d**, Expression patterns of *LHY* and *CCA1* during VISUAL ( $n = 3$ , mean  $\pm$  s.e.). Relative dephosphorylated BES1 levels determined from Fig. 2c are overlaid in yellow. **e**, Expression patterns of *LHY::LUC* in WT and *bes1* during VISUAL ( $n = 15$ , mean  $\pm$  s.e.). White, black, and gray boxes indicate light period, night period, and subjective night period, respectively. An expression peak in WT was normalized to 1.

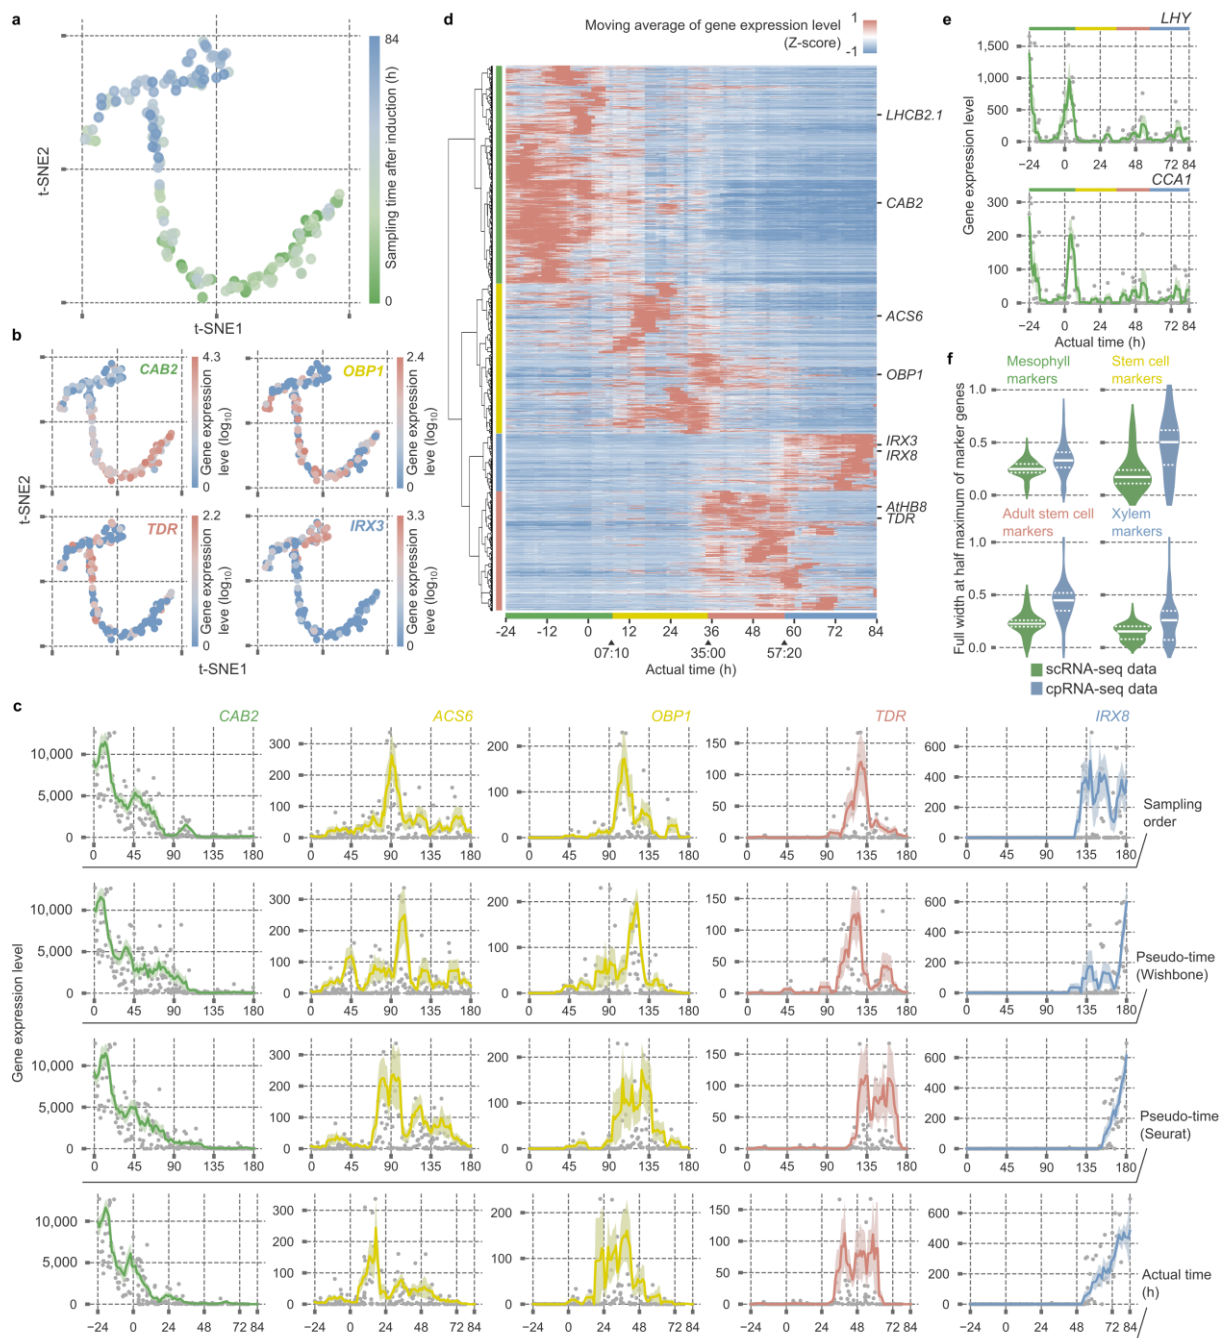

**Figure 3. WISP pipeline improves temporal resolution of scRNA-seq data.**

**a, b,** Bifurcated cell lineage on t-SNE 2D plots predicted by Wishbone, showing sampling times, and overlaid by expression levels of cell-type-specific markers. Color codes indicate sampling times from early (green) to late (blue) (**a**) and normalized UMI counts from low (blue) to high (red) (**b**). **c,** Comparison of marker gene expression patterns aligned by sampling order, pseudo time (Wishbone), pseudo time (Wishbone-Seurat), and actual time (WISP). **d,** A hierarchically-clustered heat map visualizing Z-scores of moving averages of gene expression levels with a window size of 4 h. Green, yellow, red, and blue vertical bars indicate marker genes for mesophyll cells, stem cells, vascular stem cells, and xylem cells, respectively. **e,** Reconstruction of 24 h periodicity in time-series scRNA-seq by the WISP pipeline. Green, yellow, red, and blue bars indicate mesophyll cell, stem cell, vascular stem cell, and xylem cell states, respectively. **f,** Comparison of full width at half maximum of cell-



type-specific marker expression peaks between the actual time-series scRNA-seq data and the cpRNA-seq data. White solid lines indicate the median. White broken lines indicate the upper and lower quartiles.

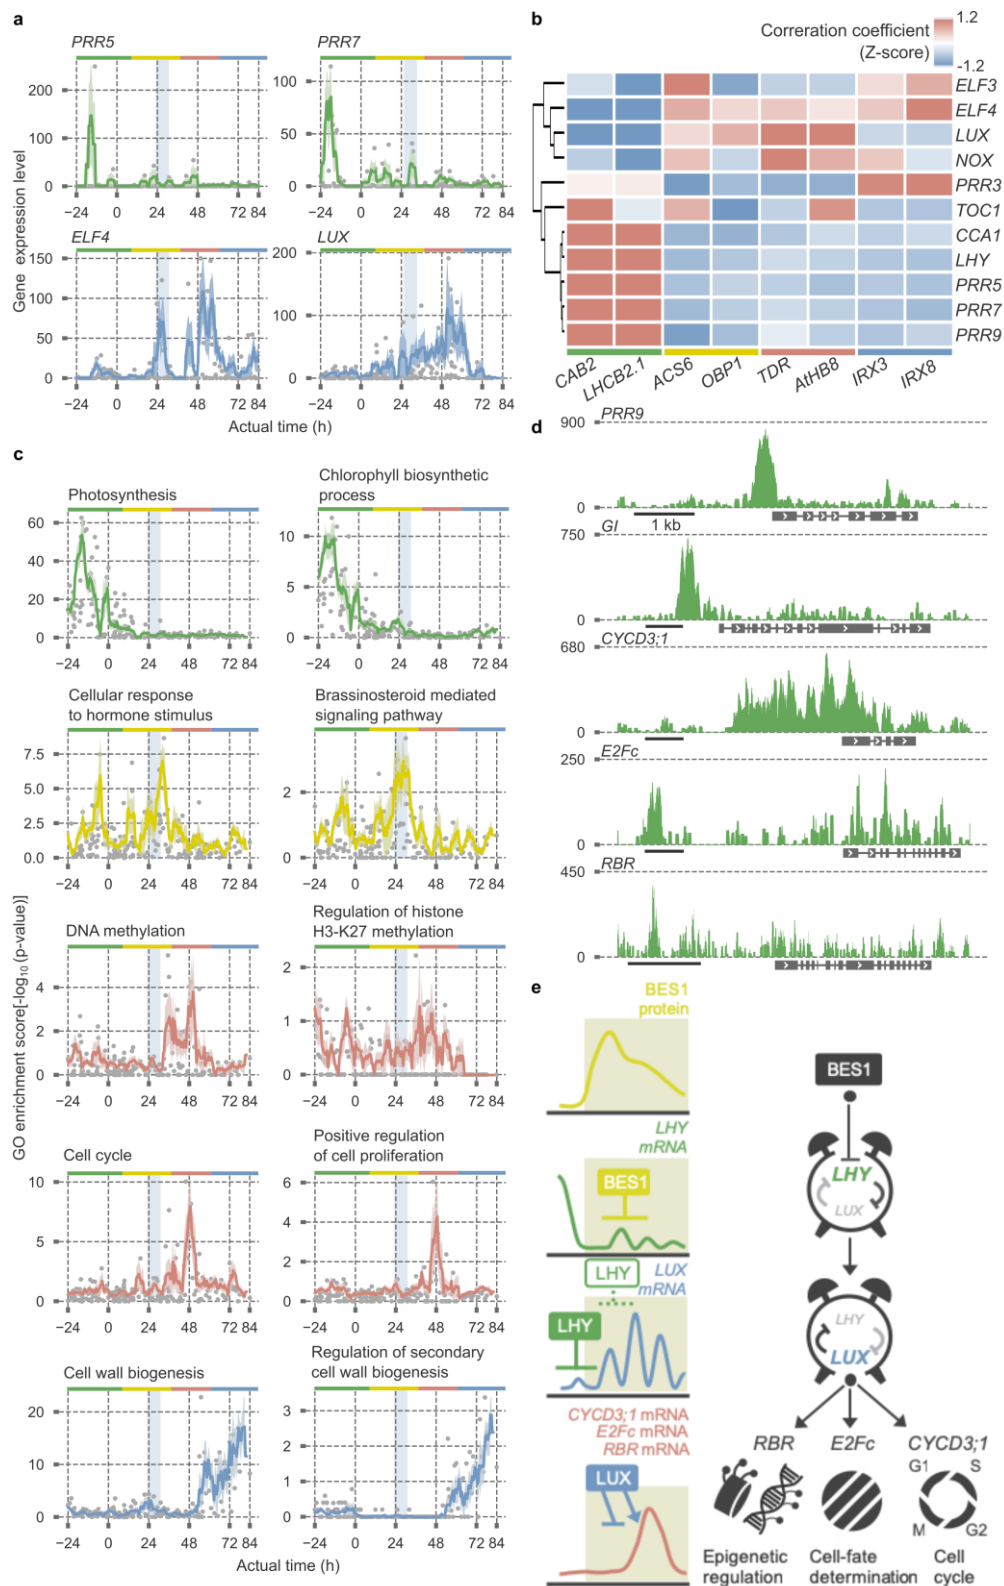

**Figure 4. Reconstruction of circadian rhythms prior to cell-fate determination.**

**a**, Expression patterns of clock genes in actual time-series scRNA-seq data. Expression of *ELF4* and *LUX* originates in the stem cell. The first peak time of *ELF4* and *LUX* expression is highlighted by the pale blue window. **b**, Correlation coefficient between clock genes and cell-type-specific markers. **c**, GO-term enrichment during cell-fate transition. Genes related to cell cycle are enriched soon after the first peak of *ELF4* and *LUX* expression. The first peak time

of *ELF4* and *LUX* expression is highlighted by the pale blue window. Green, yellow, red, and blue bars indicate mesophyll cell, stem cell, vascular stem cell, and xylem cell states, respectively. **d**, Visualization of ChIP-seq data around genes related to clock, cell cycle, cell-fate determination, and epigenetic regulation (bar = 1 kb). Peak counts of reads are shown. **e**, Our model proposes that BES1 represses *LHY* expression in stem cells to reconstruct the circadian clock, resulting in induction of *LUX* expression. *LUX* in the reconstructed clock modulates key factors for epigenetic regulation, cell-fate determination, and cell cycle, thereby inducing cell differentiation.

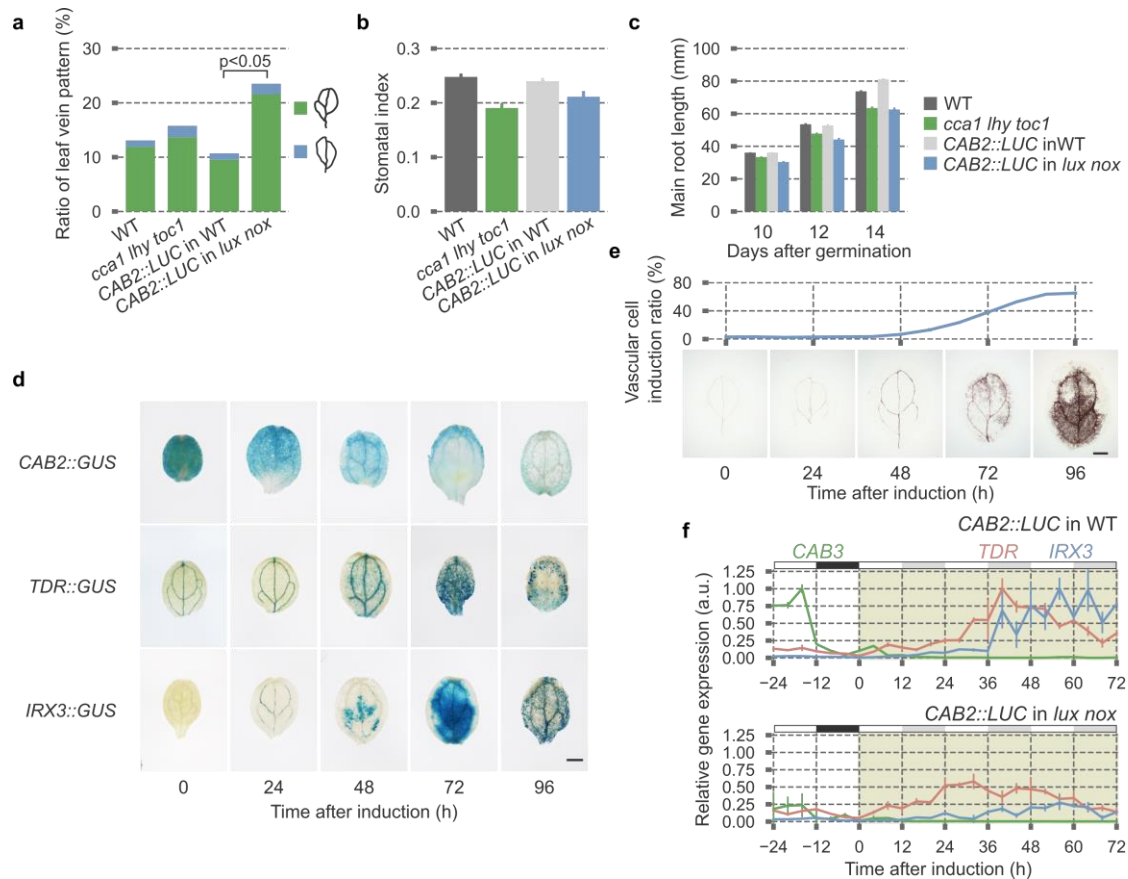

### Supplementary Figure 1. Circadian clock associated with cell differentiation in VISUAL and non-VISUAL.

**a–c**, Phenotypic analyses of vascular bundle development in cotyledons (**a**,  $n = 100$ , chi-square test,  $p < 0.05$ ), guard cells (**b**,  $n = 5$ , mean  $\pm$  s.e.), and main roots (**c**,  $n = 10$ , mean  $\pm$  s.e.) using WT and clock mutants. Abnormal leaf vein patterns were categorized according to the numbers of areoles (**a**). Stomatal index was calculated as previously described<sup>24</sup> (**b**). **d,e**, GUS staining of cell-type-specific markers (**d**) and the vascular cell induction ratio (**e**) during VISUAL. Representative photos of lignin staining are below (**e**, bar = 1 mm). **f**, Expression patterns of cell-type-specific markers in *lux nox* and corresponding WT during VISUAL ( $n = 3$ , mean  $\pm$  s.e.). Green, red, and blue lines indicate marker genes for mesophyll cells (*CAB3*), vascular stem cells (*TDR*), and xylem cells (*IRX3*), respectively. White, black, and gray boxes indicate light period, night period, and subjective night period, respectively. Peak expression levels of each respective gene in WT were normalized to 1.

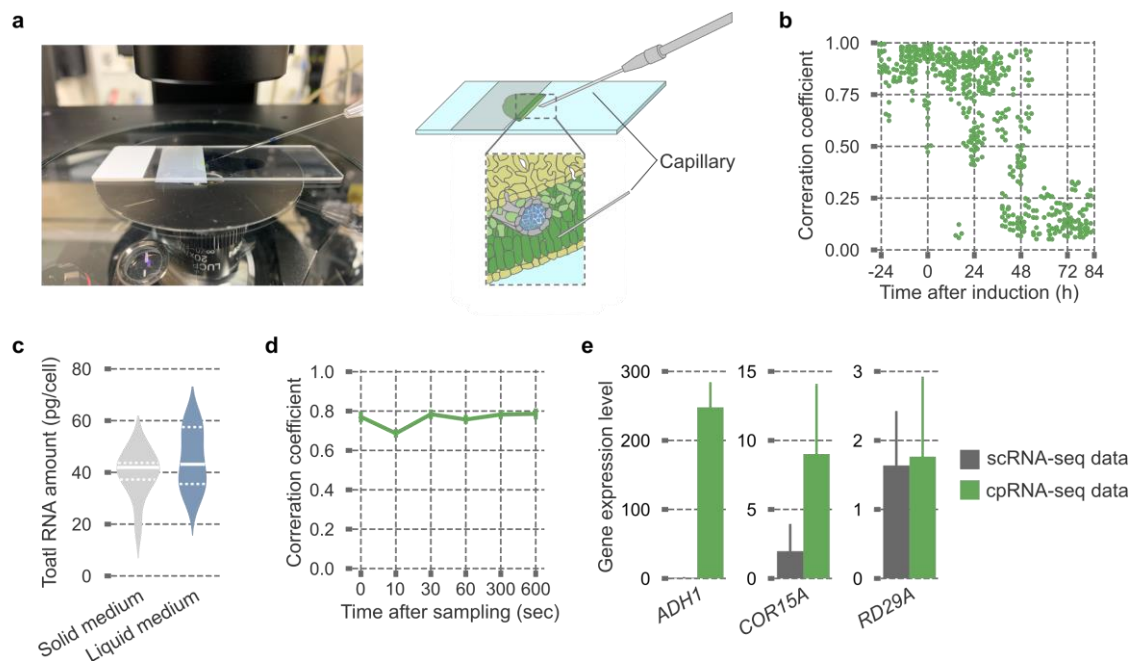

### Supplementary Figure 2. Single-cell transcriptome analysis using microcapillary in *Arabidopsis*.

**a**, Set up for microcapillary manipulation to physically extract the contents of individual cells using glass capillaries. **b**, Assessment of scRNA-Seq data during VISUAL. Due to the stochastic cell differentiation in VISUAL, the values of Pearson's correlation coefficient between samples in the same time points become smaller, suggesting the existence of various types of cells in later time points. **c**, Estimation of total RNA amounts in a single cell. Plants were grown in liquid media and solid agar media, and then isolated cells were analysed as protoplasts. Averaged amounts of total RNA in single cells were comparable ( $n = 10$ , mean  $\pm$  s.e.). White solid lines indicate the median. White broken lines indicate the upper and lower quartiles. **d**, Estimation of mRNA stability during glass capillary-based sampling. In our protocol, harvested single-cell contents were reverse transcribed within 60 s. Even when samples were kept in the glass capillary for 600 s, the values of Pearson's correlation coefficient between samples from the same time points were almost the same. **e**, Comparison of stress-induced genes expression between cpRNA-seq and scRNA-seq ( $n = 2$  for cpRNA-seq,  $n = 9$  for scRNA-seq, mean  $\pm$  s.e.). Lower expression levels of *ADH1* and *COR15A* in scRNA-seq indicate that the process of harvesting single cells does not induce stress responses.

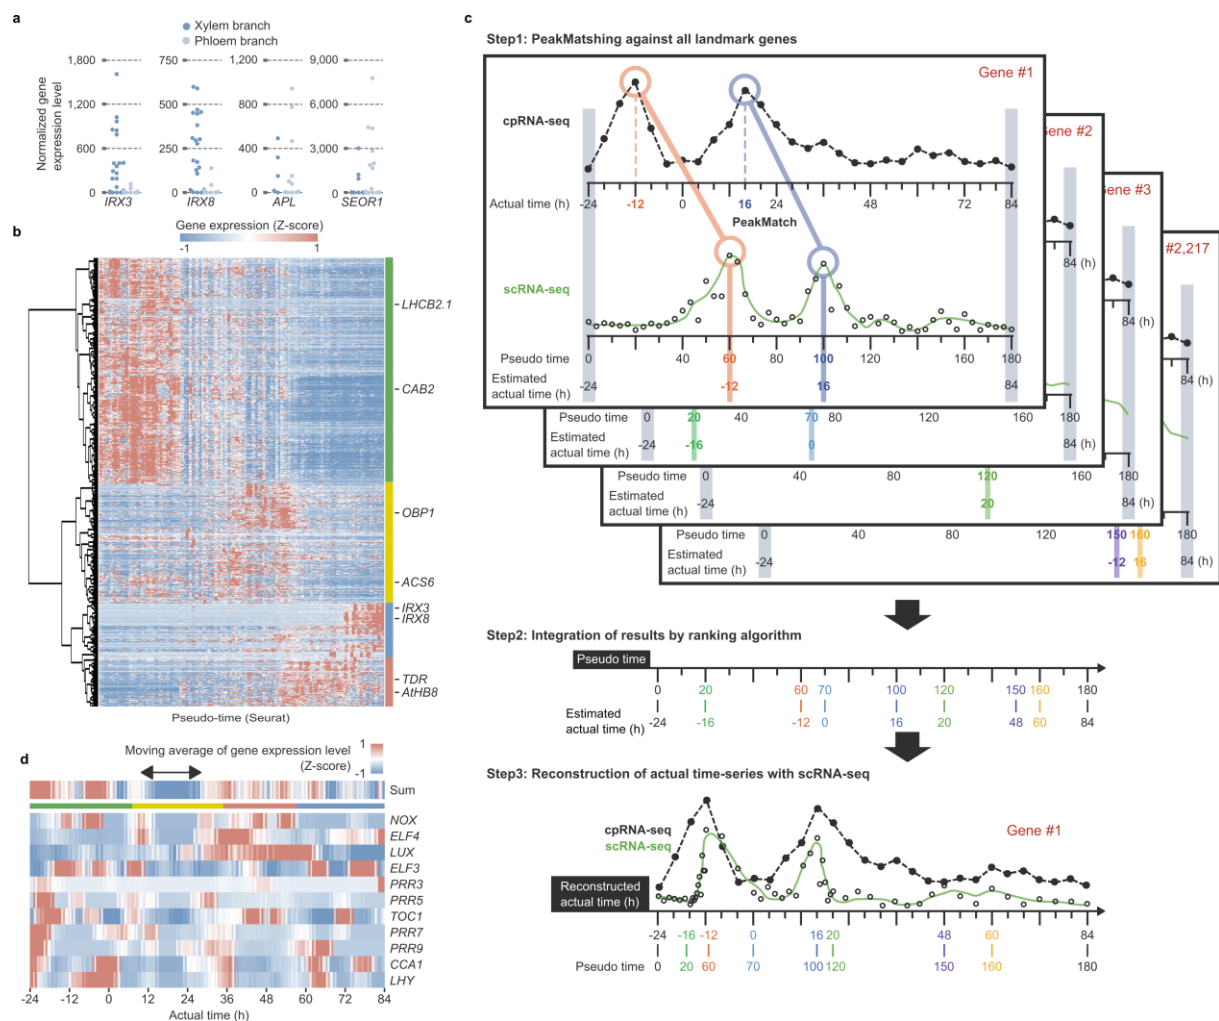

### Supplementary Figure 3. Reconstruction of actual time-series by the WISP pipeline.

**a**, Separation of xylem and phloem trajectories by Wishbone. Normalized gene expression levels of marker genes for xylem (*IRX3* and *IRX8*) and phloem (*APL* and *SEOR1*) in each branch are shown. **b**, Hierarchical clustering of pseudo time-series data shows discriminatory gene sets. Green, yellow, red, and blue bars indicate the clusters of mesophyll cell, stem cell, vascular stem cell, and xylem cell states. Marker genes for each cell type are denoted at the right. **c**, A conceptual overview of PeakMatch. The timing of significant gene expression peaks can be comparable between pseudo time-series scRNA-seq data and actual time-series cpRNA-seq data. **d**, A heatmap visualizing Z-scores of moving average of each clock gene expression level and their sum total with window size of 4 h. A double-headed arrow indicates a period of time when clock genes cease their rhythmic expression in the stem cell states. In **d** and **e**, green, yellow, red, and blue horizontal bars indicate periods of time corresponding to mesophyll cell, stem cell, vascular stem cell, and xylem cell states, respectively.

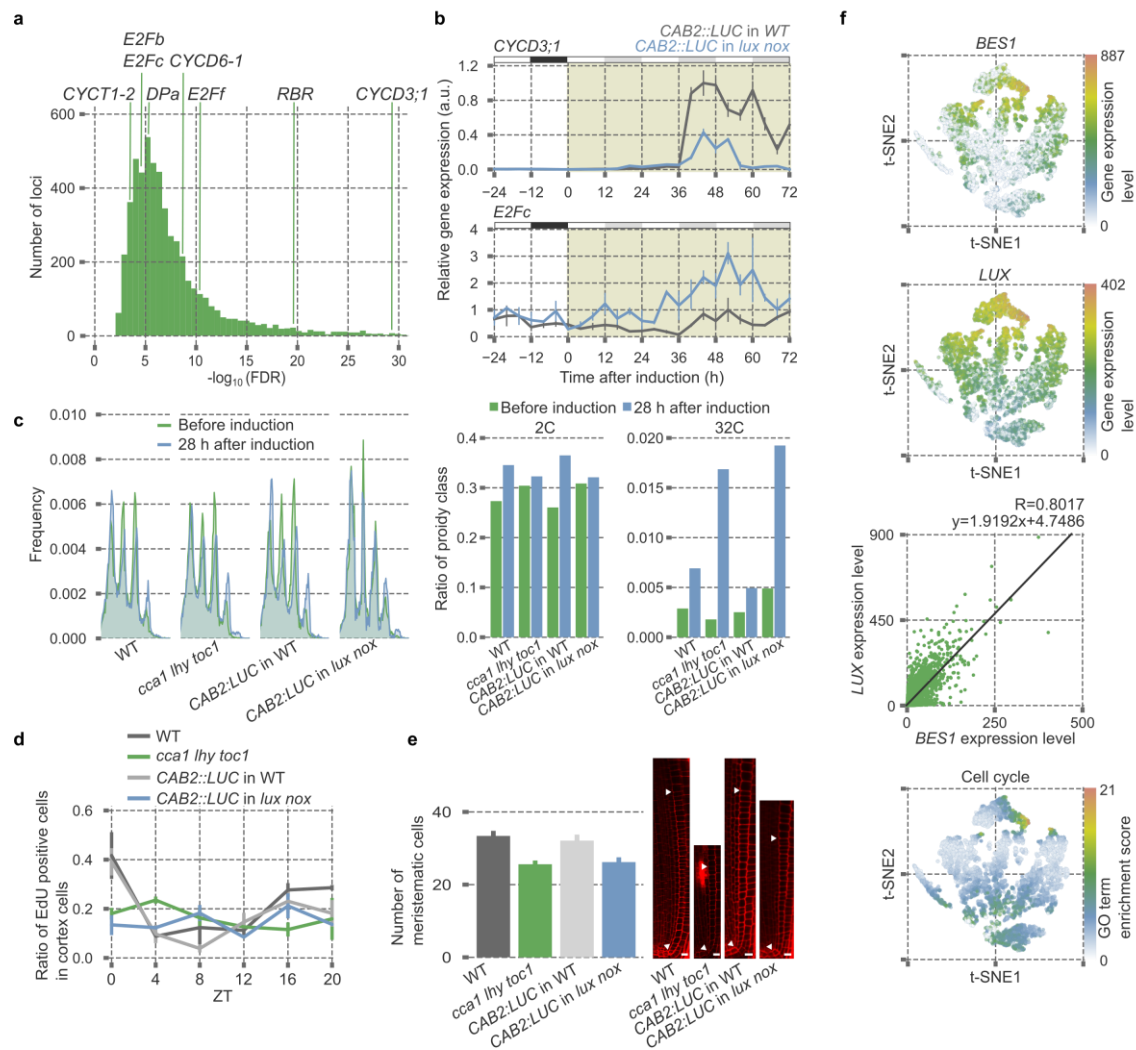

### Supplementary Figure 4. Circadian clock regulates cell-cycle progression.

**a**, FDR distributions of genes related to  $G_1$ -S transition in the candidate LUX target genes. **b**, Expression patterns of *CYCD3;1* and *E2Fc* during VISUAL in *lux nox* and corresponding WT ( $n = 3$ , mean  $\pm$  s.e.). Peak expression levels of each respective gene in WT were normalized to 1. White, black, and gray boxes indicate light period, night period, and subjective night period, respectively. **c**, DNA ploidy analyses before and 28 h after induction using WT and clock mutants ( $n = 10$ , mean). Left, DNA ploidy distribution with or without VISUAL. Right, bar graphs of the ratio of 2C and 32C ploidy levels. Clock mutants show increased polyploidy levels probably due to defects in cell-cycle progression. **d**, Incorporation assays of EdU in root meristematic regions using WT and clock mutants under L/D conditions ( $n = 5$ , mean  $\pm$  s.e.). **e**, Comparison of meristematic cell numbers in the root apical meristem using WT and clock mutants ( $n = 5$ , mean  $\pm$  s.e., bar = 10  $\mu\text{m}$ ). Representative photos of root meristematic regions are on the right side. Arrowheads indicate the initial and end points of the meristematic zone. **f**, Re-analyses of scRNA-seq data derived from root tissues<sup>20</sup>. Top and second from the top, t-SNE 2D plots overlaid by expression levels of *BES1* and *LUX*. Second from the bottom, correlation coefficient between *BES1* and *LUX* expression levels. Bottom, t-SNE 2D plots overlaid by enrichment scores of the GO-term cell cycle. Genes related to cell cycle are enriched in the cells showing high expression levels of both *BES1* and *LUX*.

**Supplementary Table 2. List of a landmark gene set for Seurat**

Seurat landmark genes list

| AGI code  | Primary gene symbol | Binary gene expression pattern |
|-----------|---------------------|--------------------------------|
| AT2G05100 | LHCB2.1             | 1100000000000000000000         |
| AT1G29910 | CAB3                | 1010000000000000000000         |
| AT4G39210 | APL3                | 0111100000000000000000         |
| AT2G39800 | P5CS1               | 0111100000000000000000         |
| AT5G12940 | -                   | 00011111111111111100000        |
| AT2G47780 | LDAP2               | 0000111000000000000000         |
| AT3G10720 | -                   | 0000111111000000000000         |
| AT4G32460 | BDX                 | 0000111111111000000000         |
| AT1G04240 | SHY2                | 0000011111111100000000         |
| AT1G14900 | -                   | 0000001111000000000000         |
| AT5G04080 | ATHCYSTM12          | 0000001111111110000000         |
| AT4G32880 | AtHB8               | 0000001111111111100000         |
| AT2G37925 | COPT4               | 000000111111111110000          |
| AT3G28740 | CYP81D11            | 000000111111111111011          |
| AT5G60200 | MAG1                | 0000000011111100000000         |
| AT3G15680 | TMO6                | 0000000011111111100000         |
| AT3G47810 | -                   | 0000000011111111100000         |
| AT4G23895 | -                   | 00000000000000111111111        |
| AT1G79430 | APL                 | 00000000000000111111111        |
| AT1G79180 | MYB63               | 00000000000000011110000        |
| AT5G17420 | IRX3                | 00000000000000011111111        |
| AT3G01680 | SEOR1               | 00000000000000011111111        |
| AT5G54690 | GAUT12              | 00000000000000011111111        |
| AT1G16490 | MYB58               | 00000000000000000001111        |
